# Supplementary material for: Carrier induced magnetic coupling transitions in phthalocyanine-based organometallic sheet
Source: Royal Society of Chemistry journal article supplement (doi:10.1039/c3nr04041k), 2013-10-07
Supplement: c3nr04041k.pdf [file c3nr04041k.pdf]

## Electronic Supplemental Information

### Carrier induced magnetic coupling transitions in phthalocyanine based organometallic sheet

Jian Zhou<sup>1</sup> and Qiang Sun<sup>1,2,\*</sup>

<sup>1</sup>Department of Materials Science and Engineering, Peking University, Beijing 100871, China

<sup>2</sup>Center for Applied Physics and Technology, Peking University, Beijing 100871, China

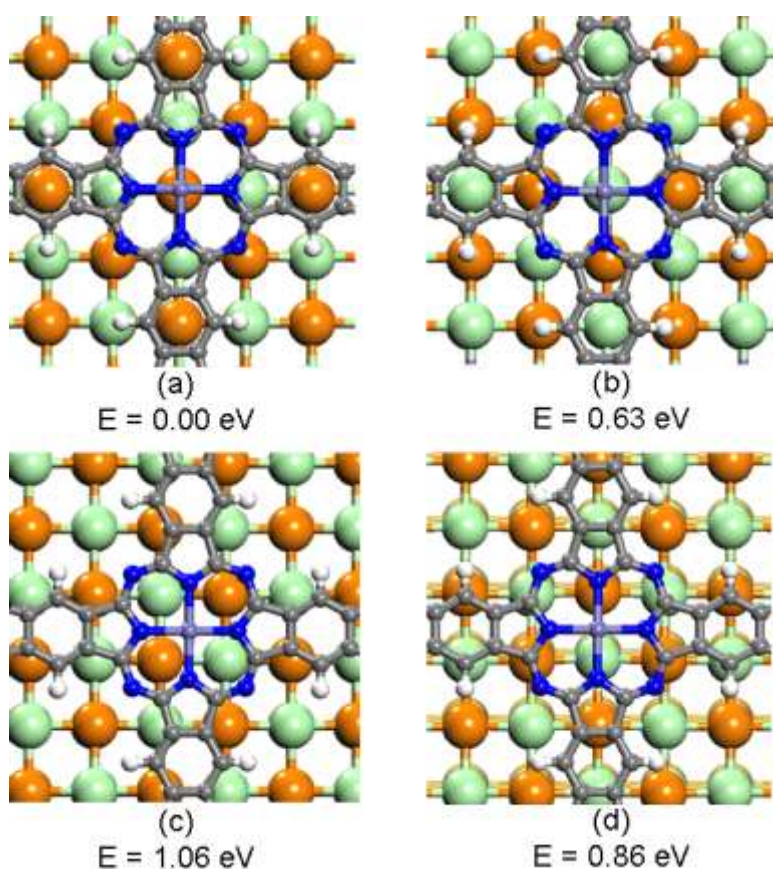

Fig. S1 Various stacking patterns and their cooresponding energies of poly-FePc absorbed on NaCl(100) film, with each Fe atom sits directly on (a) a Na atom, (b) a Cl atom, (c) hollow site, and (d) bond site.

---

\* sunqiang@pku.edu.cn
